# Supplementary material for: A Soft Robot Tactile Finger Using Oxidation-Reduction Graphene–Polyurethane Conductive Sponge
Source: MDPI journal article supplement (doi:10.3390/mi15050628), 2024-05-07
Supplement: s1 [file s1]

Article

# A soft robot tactile finger using oxidation-reduction graphene-polyurethane conductive sponge

Hangze Li <sup>1</sup>, Chaolin Ma <sup>1</sup>, Jinmiao Chen <sup>1</sup>, Haojie Wang <sup>1</sup>, Xiao Chen <sup>1</sup>, Zhijing Li <sup>2</sup> and Youzhi Zhang <sup>1,\*</sup>

<sup>1</sup> School of Mechanical and Electrical Engineering, Wenzhou University, Wenzhou, 325025, China; li-hangze2023@163.com(H.L.); mchaolin2023@163.com(C.M.); chen-jinmiao22@163.com(J.C.); wanghaojie020@163.com(H.W.); lscx09@163.com(X.C.)

<sup>2</sup> School of Information and Electrical Engineering, Hunan University of Science and Technology, Xiangtan, 411201, China, lizhijingwei@163.com;

\* Correspondence: zhangyouzhi@wzu.edu.cn

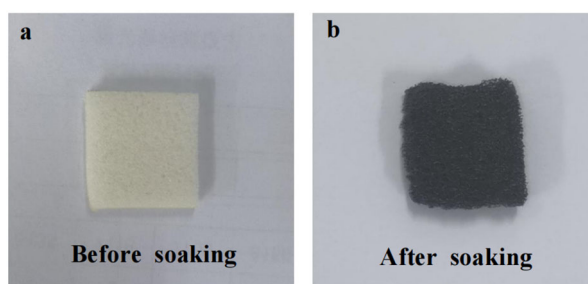

**Figure S1.** Photographs of polyurethane sponge before and after immersion in graphene oxide and HI solutions.

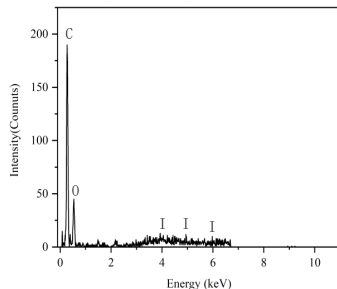

**Figure S2.** Elemental diagram of RGO-PUF with 50D hardness after 5 soakings.

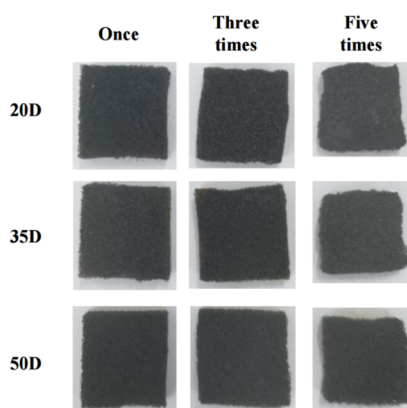

**Figure S3.** Morphological changes of RGO-PUF with different hardnesses under different number of soaks.

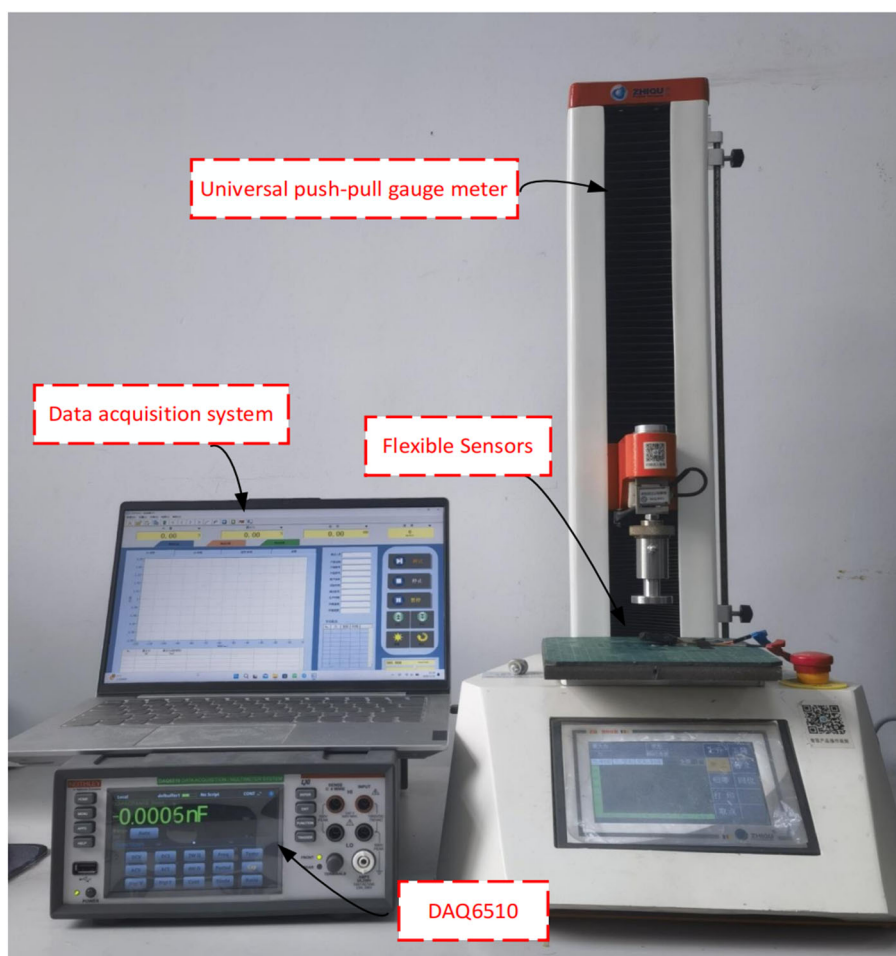

**Figure S4.** Schematic diagram of the experimental setup. The whole system consists of ZQ-990B, DAQ6510 and computer. ZQ-990B is connected to the computer through wires, and the computer sets the parameters to regulate the pressure; DAQ6510 is connected to the computer through the USB cable, and the collected capacitance value is fed back to the computer.

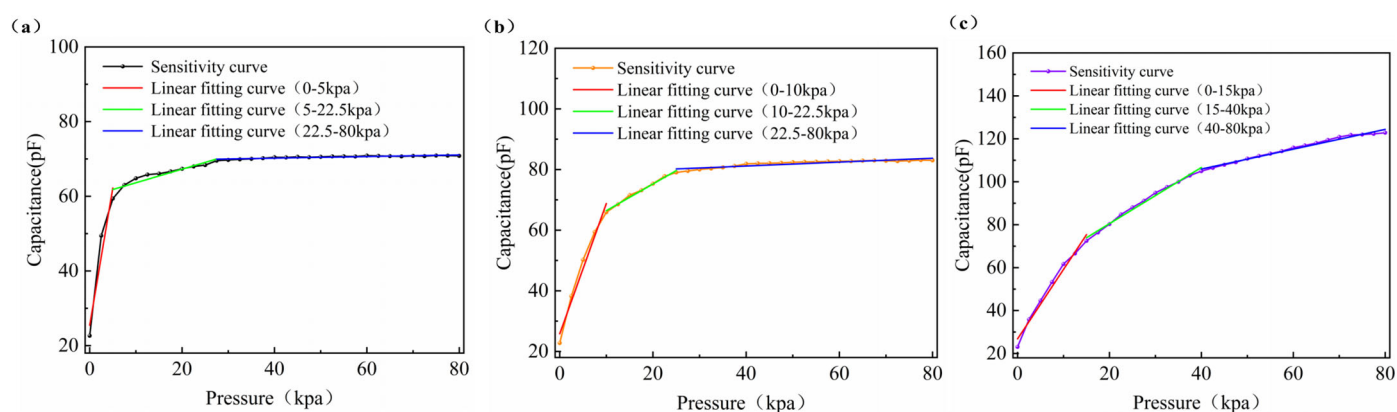

**Figure S5.** Linear fit plots of fingertip tactile samples of different hardness of RGO-PUF under five immersions. (a) RGO-PUF with 20D hardness. (b) RGO-PUF with 35D hardness. (c) RGO-PUF with 50D hardness.

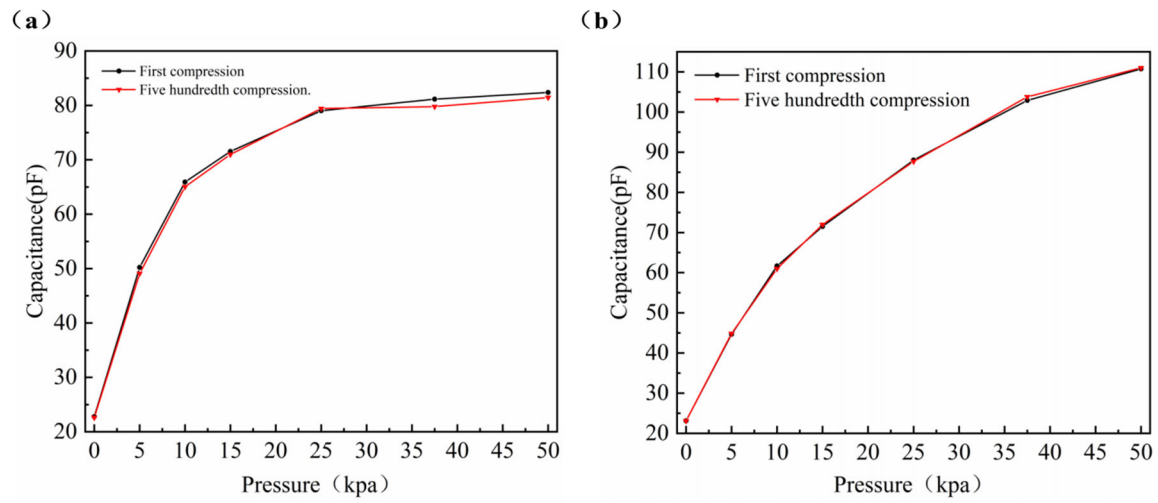

**Figure S6.** Repeatability testing of tactile fingertip samples under different applied pressures. (a) Repeatability of RGO-PUF with 20D hardness after 5 soaks. (b) Repeatability of RGO-PUF with 50D hardness after 5 soaks.
